# Supplementary material for: Comparative analysis and phylogenetic investigation of Hong Kong Ilex chloroplast genomes
Source: PubMed Central journal article supplement (PMC7933167; doi:10.1038/s41598-021-84705-9), 2021-03-04
Supplement: 41598_2021_84705_MOESM7_ESM.pdf [file 41598_2021_84705_MOESM7_ESM.pdf]

(a)

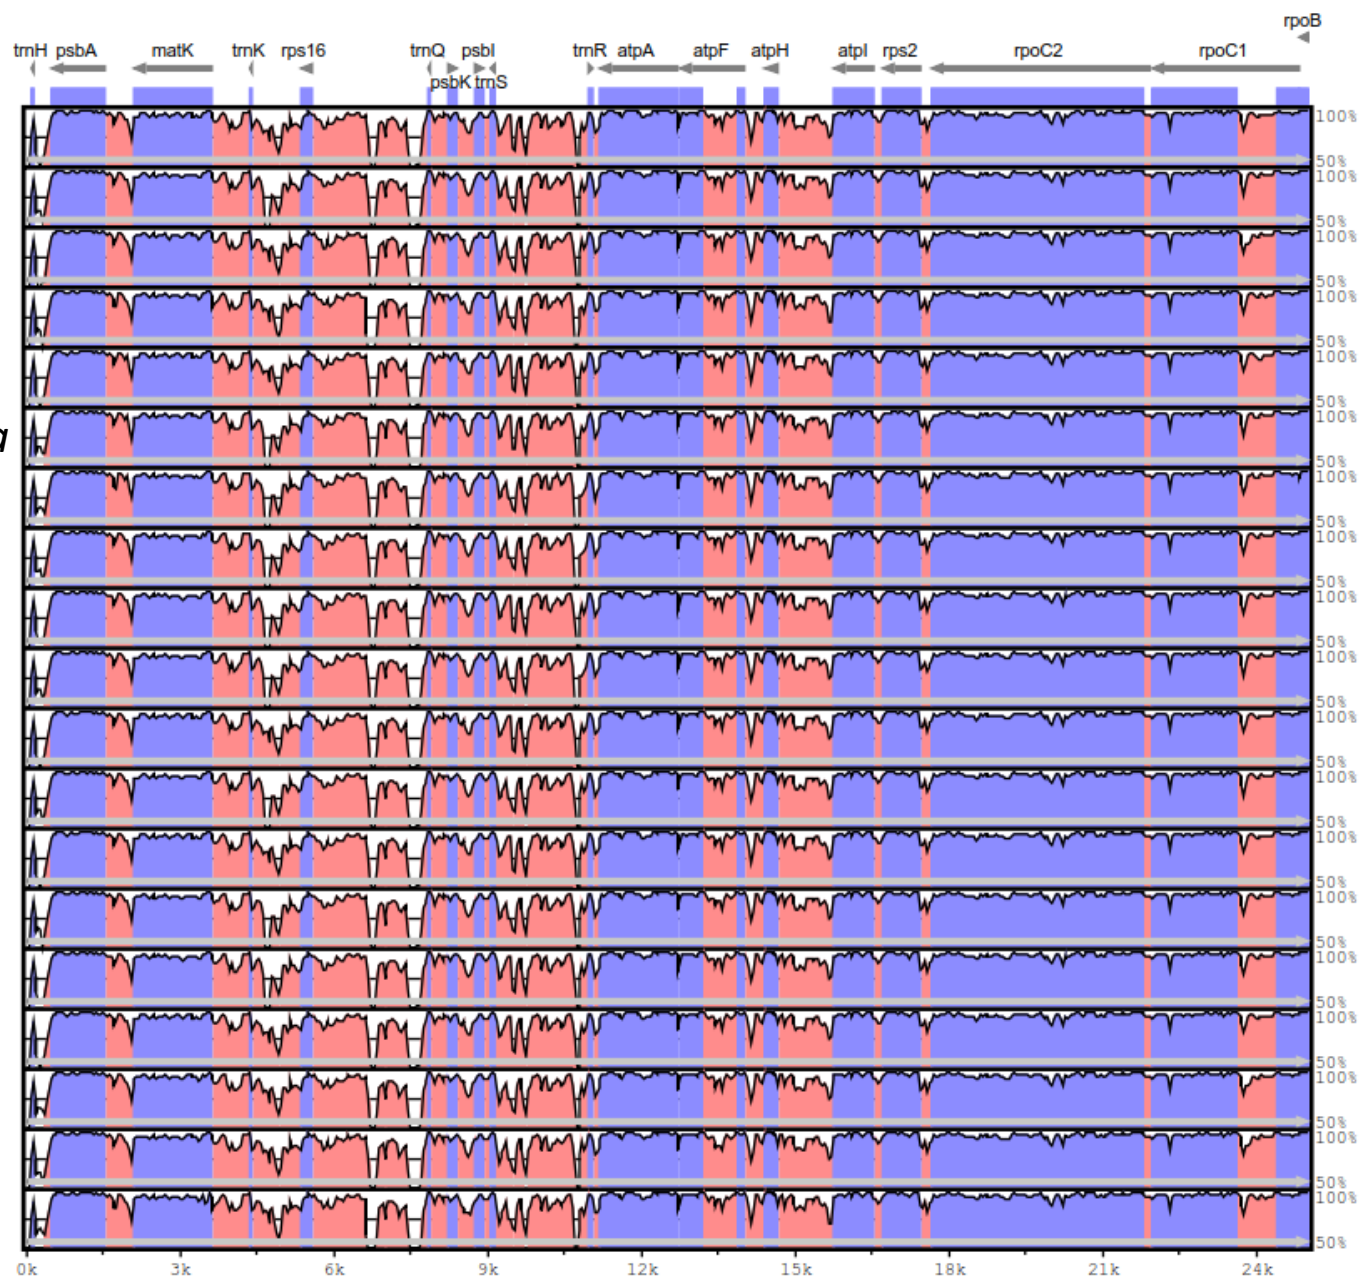

(b)

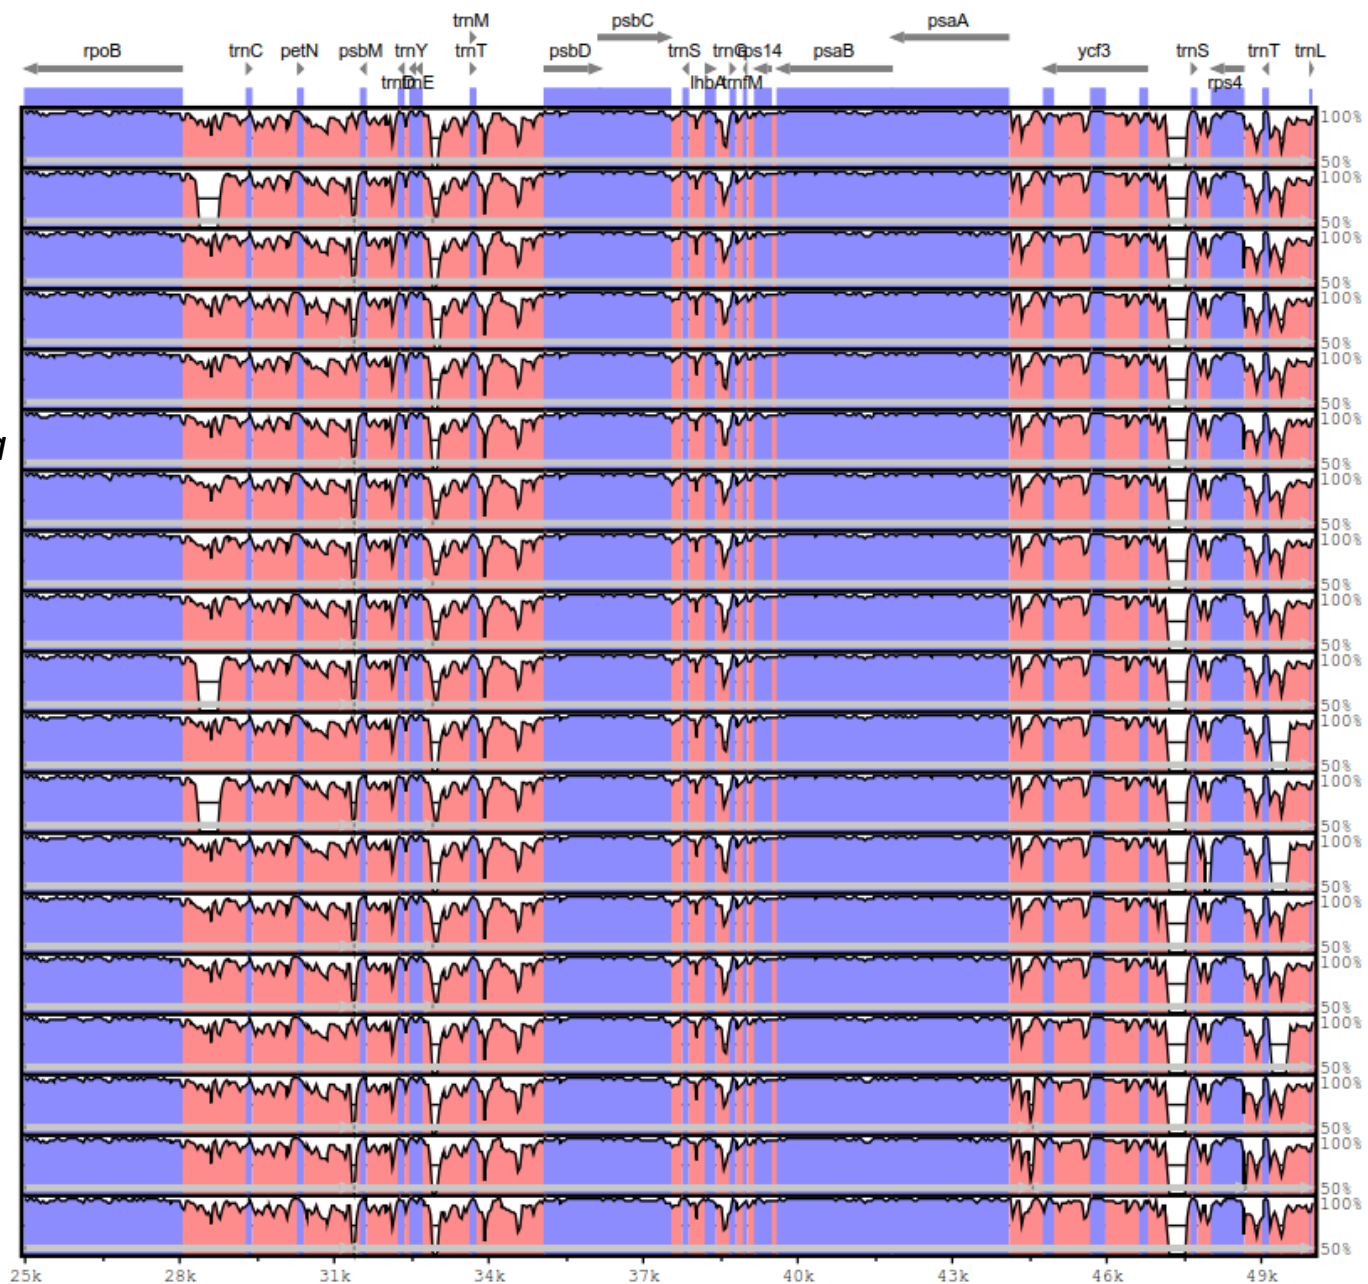

(c)

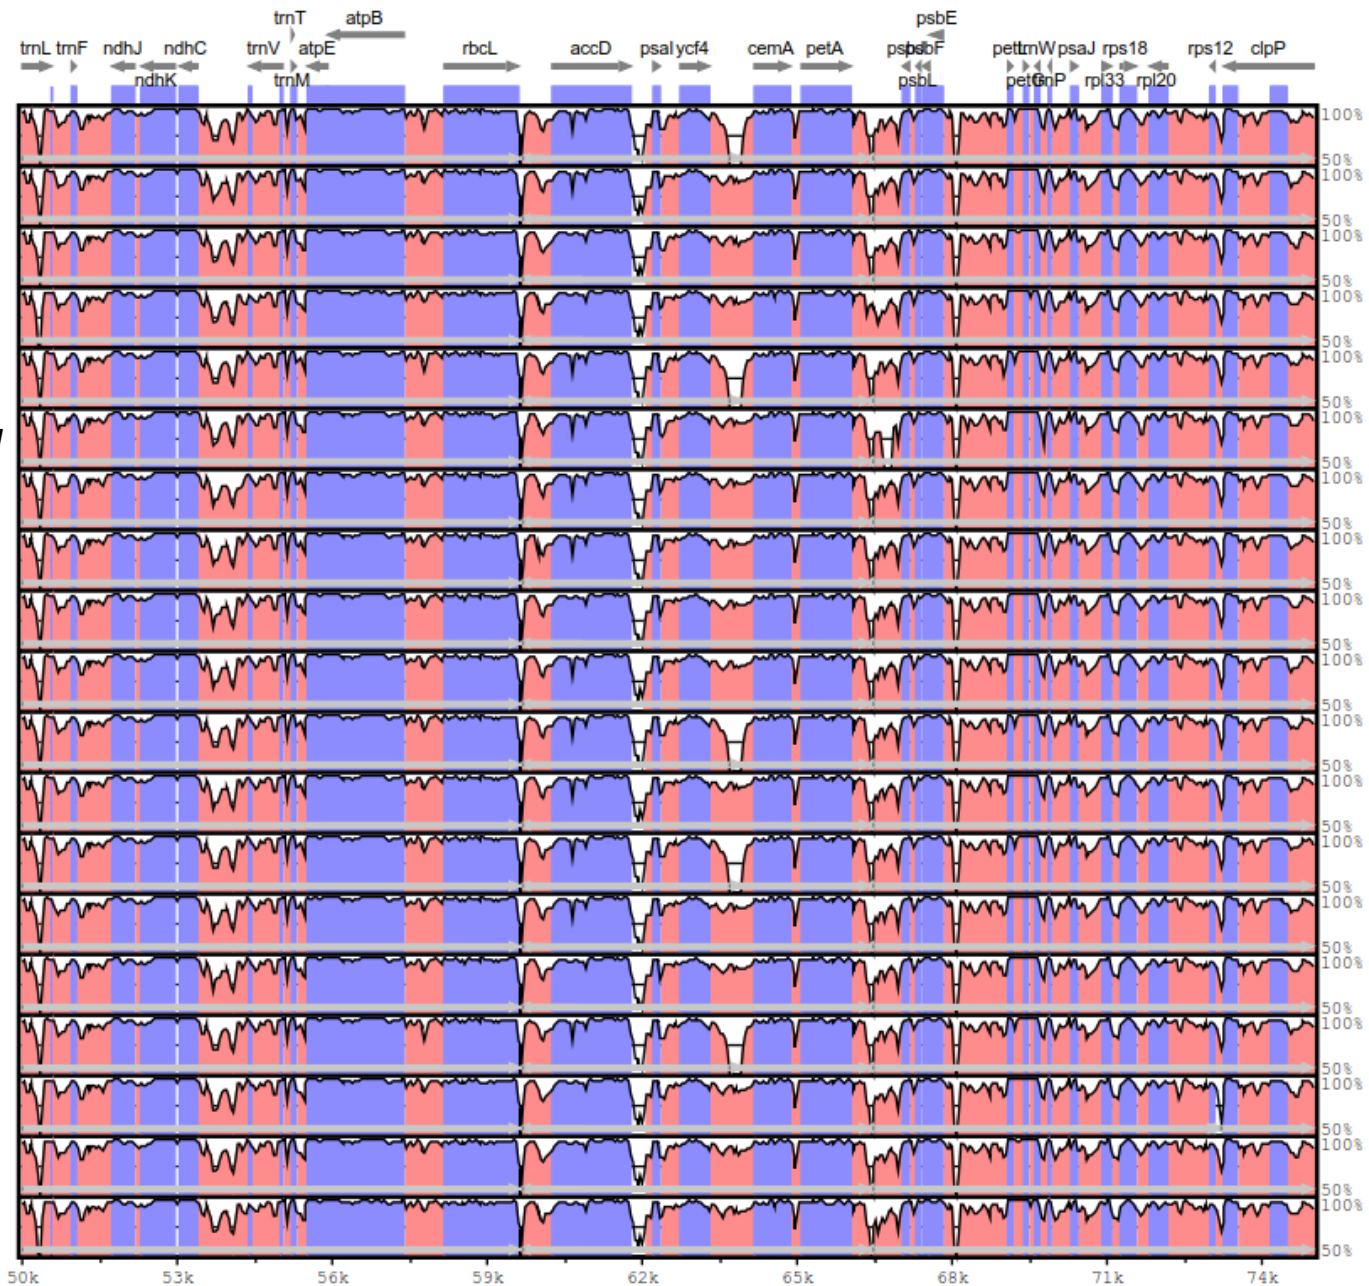





(e)

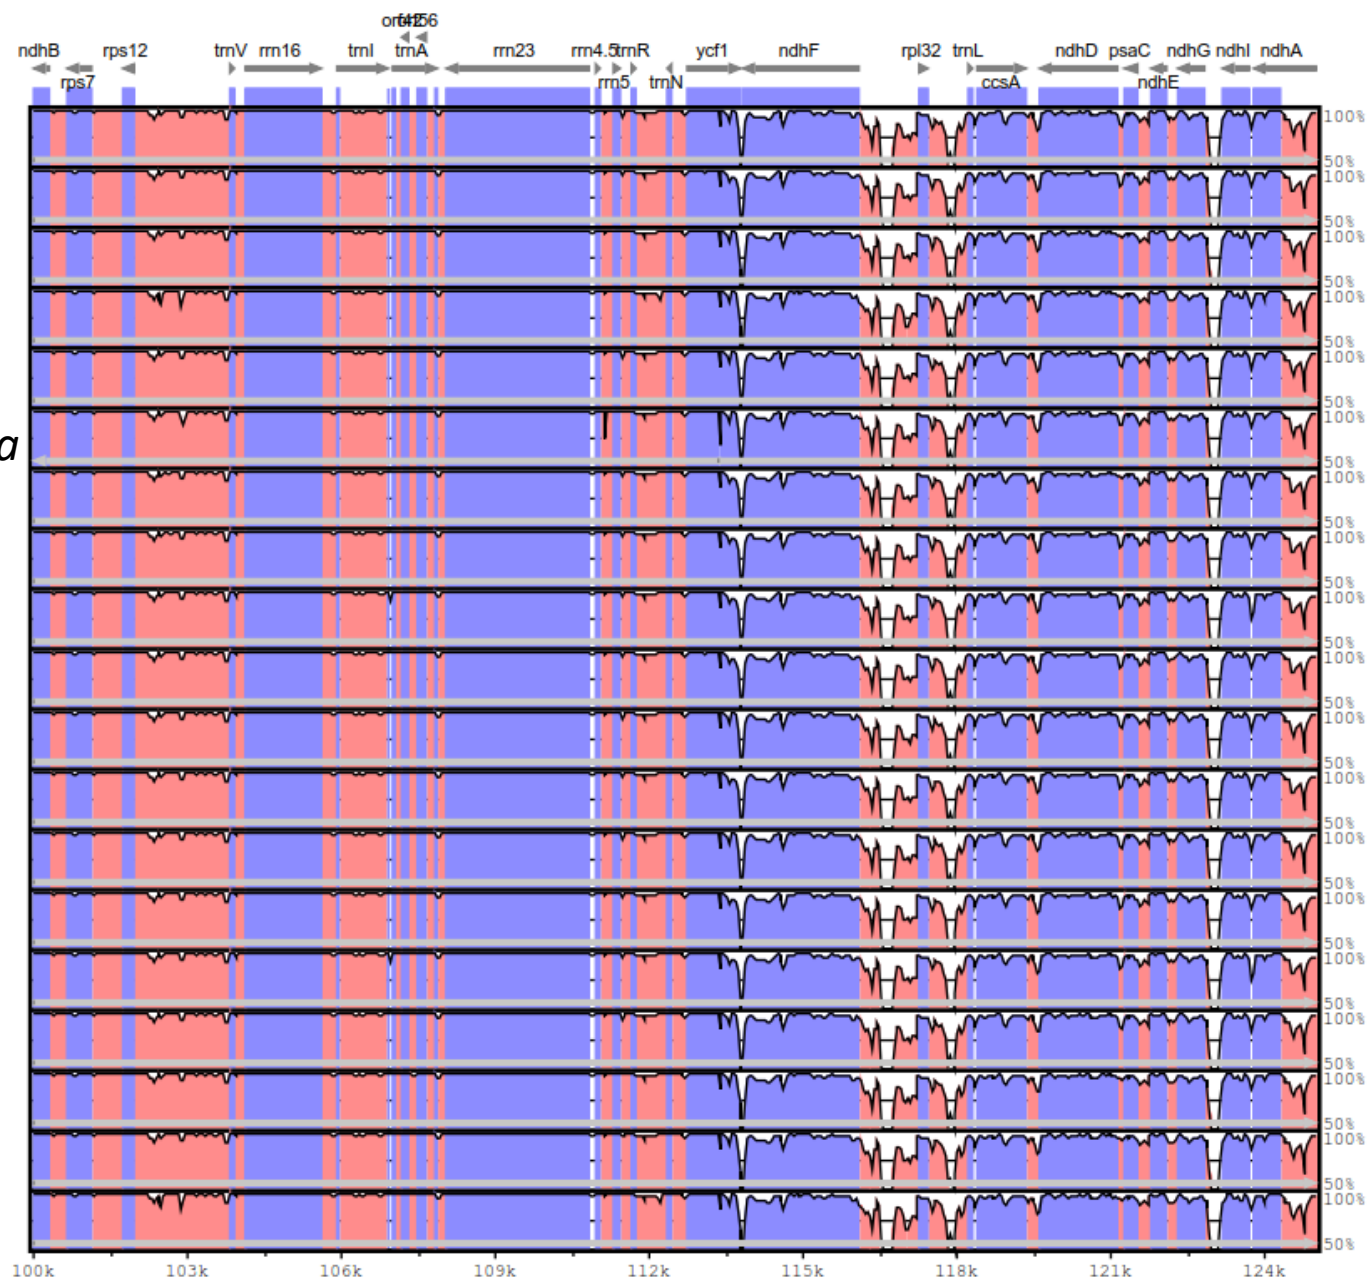

(f)

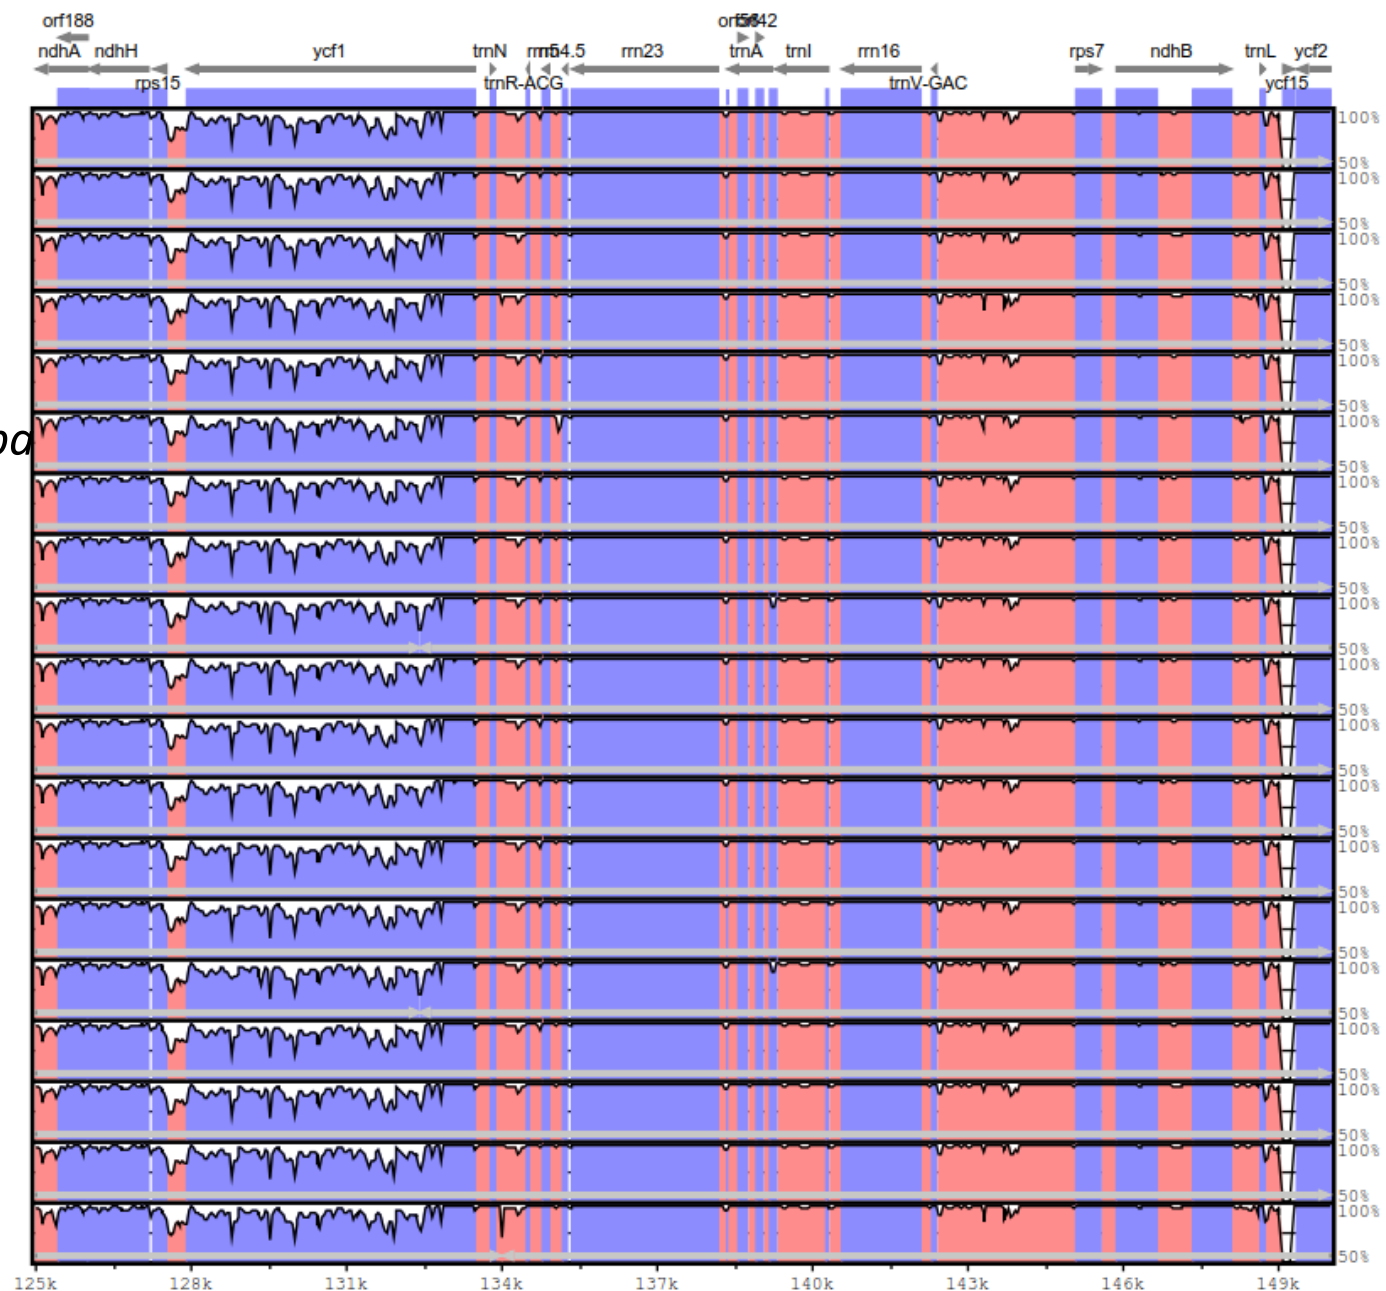

(g)

- I. latifolia*
- I. lohfauiensis*
- I. kwangtungensis*
- I. triflora*
- I. ficoidea*
- I. rotunda var. microcarpa*
- I. asprella*
- I. pubescens*
- I. asprella var. tapuensis*
- I. hanceana*
- I. cinerea*
- I. championii*
- I. graciliflora*
- I. memecylifolia*
- I. chapaensis*
- I. cornuta*
- I. lancilimba*
- I. dasyphylla*
- I. viridis*

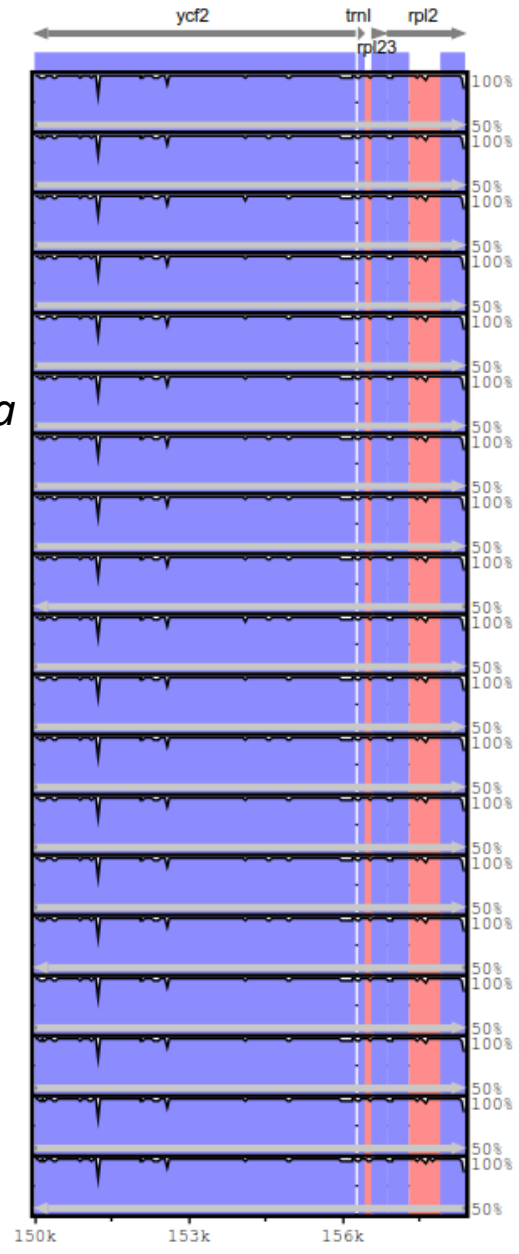

Supplementary Figure 1. Identity plot comparing the chloroplast genomes of 19 *Ilex* using *Helwingia himalaica* as a reference sequence. The vertical scale indicates the percentage of identity, ranging from 50 to 100%. The horizontal axis indicates the coordinates within the chloroplast genome. Protein-coding regions are labeled with blue while the conserved non-coding sequences (CNS) are labeled with red.
